# Supplementary material for: Humidity Effects on Domain Structure and Polarization Switching of Pb(Zn1/3Nb2/3)O3-x%PbTiO3 (PZN-x%PT) Single Crystals
Source: MDPI journal article supplement (doi:10.3390/ma14092447), 2021-05-09
Supplement: s1 [file s1]

Supplementary Materials

# Humidity Effects on Domain Structure and Polarization Switching of $\text{Pb}(\text{Zn}_{1/3}\text{Nb}_{2/3})\text{O}_{3-x}\%\text{PbTiO}_3$ (PZN- $x\%$ PT) Single Crystals

Hongli Wang <sup>1,2</sup> and Kaiyang Zeng <sup>3,\*</sup>

<sup>1</sup> The Key Lab of Guangdong for Modern Surface Engineering Technology, National Engineering Laboratory for Modern Materials Surface Engineering Technology, Institute of New Materials, Guangdong Academy of Sciences, Guangzhou 510650, China; wanghongli@gdinm.com

<sup>2</sup> Guangdong Provincial Key Laboratory of Advanced Energy Storage Materials, School of Materials Science and Engineering, South China University of Technology, Guangzhou 510640, China

<sup>3</sup> Department of Mechanical Engineering, National University of Singapore, 9 Engineering Drive 1, Singapore 117576, Singapore

\* Correspondence: mpezk@nus.edu.sg; Tel: (+65)-6516-6627; Fax: (+65)-6779-1459

In our experiment, a commercial Humidity Sensing Cell (Asylum Research, Oxford Instruments, Santa Barbara, CA, USA) was used to detect the real-time humidity. As shown in Figure S1, there are four holes in edge of the closed cell, 1 and 2 for dry and wet gas in, 3 and 4 are for gas out. The humidity can be controlled by dynamically filling the closed cell with different ratios of wet and dry gases.

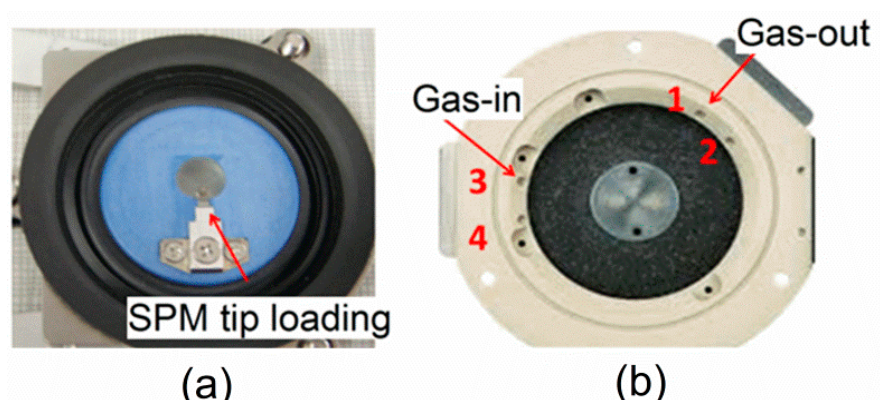

**Figure S1.** Images of the closed electrical cell: (a) the top part; and (b) the bottom part.

As shown in Figure S2, the ratio of dry and wet synthetic air can be controlled by flowmeter 1 and flowmeter 2. By adjusting the flow rate, the relative humidity manipulation can be achieved. At the same time, an environmental controlling cell with a humidity sensor is employed to detect the real-time relative humidity during the SPM measurements.

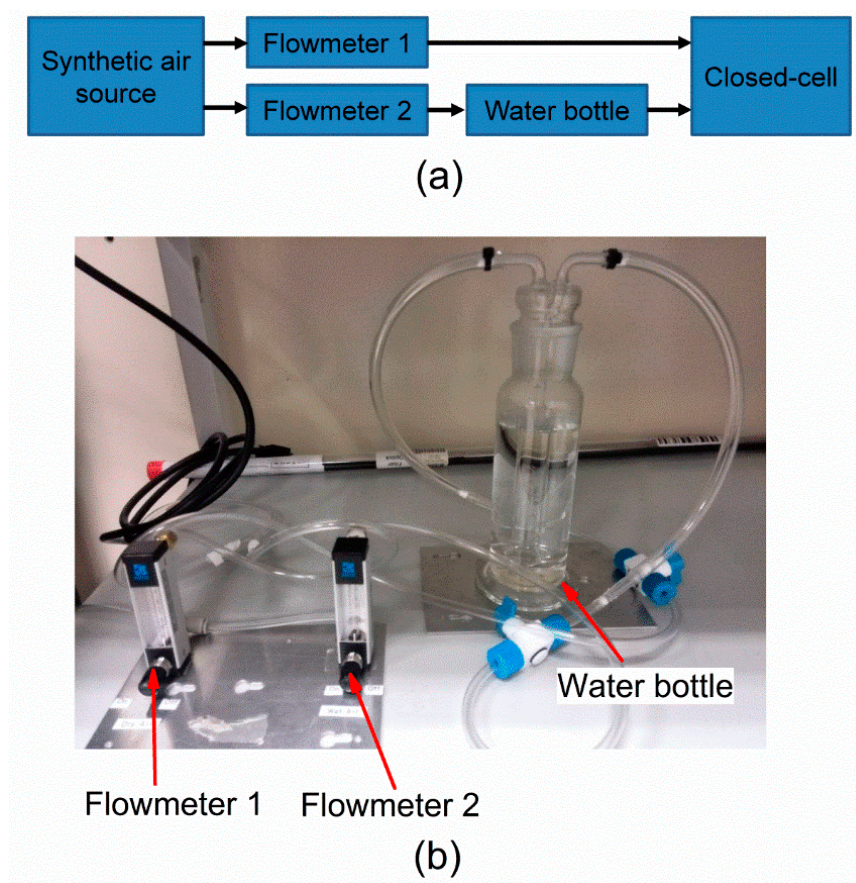

**Figure S2.** (a) schematic of humidity control system; and (b) image of the humidity control system used in this study.
